# Supplementary figures and images for: Unveiling novel longevity-regulating mechanisms of phytogenic adaptogen Phytocee TM through a computational biology approach
Source: Research Square preprint supplement (doi:10.21203/rs.3.rs-7591982/v1), 2025-10-20

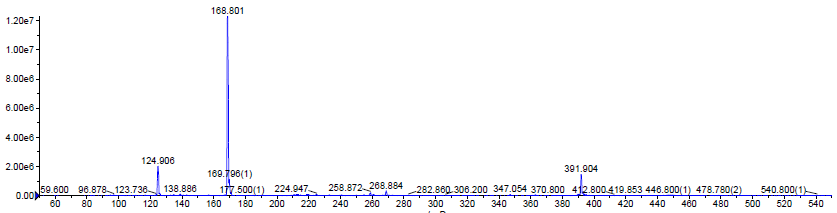

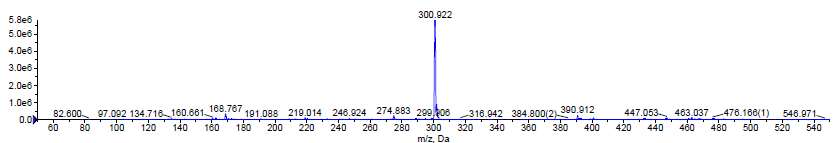


**EA**

**GA**


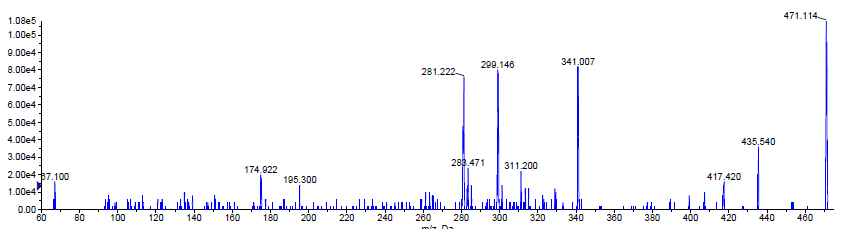

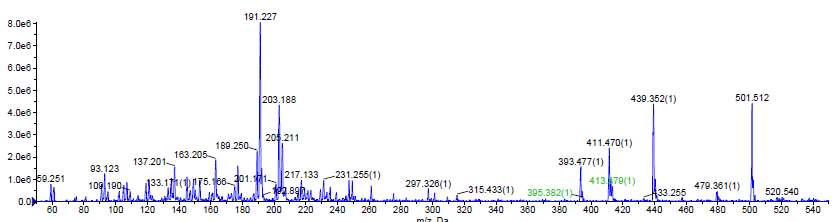


**UA**

**WA**

g- :EA- ELLAGIC ACID, GA- GALLIAC ACID, UA- URSOLIC ACID, WA- WITHAFERIN A

Supplement: Supplementary file 1 [file d260b95003ca142b617ff445.docx]
